# Supplementary material
Source: PubMed Central journal article supplement (PMC8018319)
Supplement: ONCO-26-281-s001.pdf [file ONCO-26-281-s001.pdf]

Supplemental Table for:  
Clinical benefit of tyrosine kinase inhibitors in advanced lung cancer with EGFR-G719A and other uncommon EGFR mutations  
Kartik Sehgal et al.

**Supplemental Table 1.** Additional Studies of EGFR Inhibitors in Patients with Advanced Non-Small Cell Lung Cancer with Uncommon (or Rare) *EGFR*

Mutations

| Study                                               | Study Type    | Study Location | Type of <i>EGFR</i> mutations                             | Drug(s)              | N   | Objective response rate (%) | Median PFS, months (95% CI) | Median OS, months (95% CI) |
|-----------------------------------------------------|---------------|----------------|-----------------------------------------------------------|----------------------|-----|-----------------------------|-----------------------------|----------------------------|
| <b><i>First generation EGFR inhibitors only</i></b> |               |                |                                                           |                      |     |                             |                             |                            |
| Wu <i>et al</i> , 2011 <sup>11</sup>                | Retrospective | Taiwan         | Uncommon mutations                                        | Gefitinib/ erlotinib | 62  | 48.4                        | 5.0 (0.2 – 37.5)            | 15.0 (1.1 – 59.3)          |
| De Pas <i>et al</i> , 2011 <sup>12</sup>            | Retrospective | Italy          | Rare mutations                                            | Gefitinib/ erlotinib | 10  | 30                          | Not reported                | Not reported               |
| Beau-Faller <i>et al</i> , 2014 <sup>13</sup>       | Observational | France         | Rare exon 18 & exon 20 mutations <sup>a</sup>             | Gefitinib/ erlotinib | 50  | 15                          | 4.0 (2 – NE)                | 14.0 (6 – 21)              |
| Keam <i>et al</i> , 2014 <sup>14</sup>              | Retrospective | Korea          | Rare mutations                                            | Gefitinib/ erlotinib | 16  | 25                          | 1.4 (0.3 – 2.5)             | Not reported               |
| Chiu <i>et al</i> , 2015 <sup>15</sup>              | Retrospective | Taiwan         | G719X/ L861Q/ S768I/ mutations                            | Gefitinib/ erlotinib | 161 | 41.6                        | 7.7                         | 17.2                       |
| Lohinai <i>et al</i> , 2015 <sup>16</sup>           | Retrospective | Hungary        | Rare mutations                                            | Gefitinib/ erlotinib | 20  | 37                          | 6.2                         | 7.4                        |
| Baek <i>et al</i> , 2015 <sup>17</sup>              | Retrospective | Korea          | Any mutation other than exon 19 del or L858R <sup>a</sup> | Gefitinib/ erlotinib | 54  | 20.4                        | 2.6 (0.0 – 5.4)             | 12.7 (7.2 – 18.2)          |

|                                           |                              |         |                                                                 |                                   |    |              |                   |                          |
|-------------------------------------------|------------------------------|---------|-----------------------------------------------------------------|-----------------------------------|----|--------------|-------------------|--------------------------|
| Oyeart <i>et al</i> , 2015 <sup>18</sup>  | Retrospective                | Belgium | Rare mutations <sup>a</sup>                                     | Gefitinib/ erlotinib              | 6  | 33.3         | 3.0               | Not reported             |
| Chen <i>et al</i> , 2016 <sup>19</sup>    | Retrospective                | China   | Exon 20 mutations <sup>a</sup>                                  | Gefitinib/<br>erlotinib/ icotinib | 62 | 8.1          | 2.1               | 13.3                     |
| Xu <i>et al</i> , 2016 <sup>20</sup>      | Retrospective                | China   | Uncommon<br>mutations <sup>a</sup>                              | Gefitinib/<br>erlotinib/ icotinib | 95 | Not reported | Not reported      | 18.96<br>(16.65 – 21.26) |
| Shi <i>et al</i> , 2017 <sup>21</sup>     | Retrospective                | China   | Uncommon EGFR<br>mutations <sup>a</sup>                         | Gefitinib/<br>erlotinib/ icotinib | 30 | 23.3         | 7.1               | Not reported             |
| Pilotto <i>et al</i> , 2018 <sup>22</sup> | Retrospective                | Italy   | Any mutation other<br>than exon 19 del or<br>L858R <sup>a</sup> | Gefitinib/ erlotinib              | 35 | 25.7         | 5.2 (2.7 – 10.3)  | 14.5 (8.1 – 22.5)        |
| Li <i>et al</i> , 2019 <sup>23</sup>      | Observational<br>prospective | China   | G719X/ L861Q/<br>S768I/ mutations                               | Gefitinib/<br>erlotinib/ icotinib | 51 | 33           | 7.2               | 14.3                     |
| Kate <i>et al</i> , 2019 <sup>24</sup>    | Retrospective                | India   | TKI sensitive single<br>mutation (G719X/<br>S768I/ L861Q)       | Gefitinib/ erlotinib              | 9  | 37.5         | 12.8 (4.7 – 20.9) | Not reported             |

***First AND second generation EGFR inhibitors only***

|                                               |                              |                                    |                             |                                   |    |      |                 |                    |
|-----------------------------------------------|------------------------------|------------------------------------|-----------------------------|-----------------------------------|----|------|-----------------|--------------------|
| Arrieta <i>et al</i> , 2015 <sup>25</sup>     | Observational<br>prospective | Mexico,<br>Colombia,<br>Costa Rica | Rare mutations <sup>a</sup> | Gefitinib/<br>erlotinib/ afatinib | 38 | 32.4 | 3.9 (1.9 – 5.9) | 17.4 (12.9 – 21.8) |
| Krawczyk <i>et al</i> ,<br>2017 <sup>26</sup> | Retrospective                | Poland                             | Rare mutations <sup>a</sup> | Gefitinib/<br>erlotinib/ afatinib | 13 | 53.8 | 5.0             | 22.0               |

|                                                                |               |         |                                                                           |                                                  |                                          |                                                   |                                                                             |                                                |
|----------------------------------------------------------------|---------------|---------|---------------------------------------------------------------------------|--------------------------------------------------|------------------------------------------|---------------------------------------------------|-----------------------------------------------------------------------------|------------------------------------------------|
| Hunter <i>et al</i> , 2017 <sup>27</sup>                       | Retrospective | UK      | Uncommon mutations <sup>a</sup>                                           | Gefitinib/<br>erlotinib/ afatinib                | 29                                       | 38                                                | 8.1                                                                         | Not reported                                   |
| Passaro <i>et al</i> , 2019 <sup>28</sup>                      | Retrospective | Italy   | <i>EGFR</i> exon 18 mutations                                             | Gefitinib/<br>erlotinib/ afatinib                | 42                                       | 31                                                | 8.3 (4.8 – 11.7)                                                            | 17.0 (8.2 – 25.7)                              |
| <b><i>First VS. second generation EGFR inhibitors only</i></b> |               |         |                                                                           |                                                  |                                          |                                                   |                                                                             |                                                |
| Shen <i>et al</i> , 2017 <sup>32</sup>                         | Retrospective | Taiwan  | Non-classical mutations (alone or in combination)                         | Gefitinib/ erlotinib<br>VS.<br>Afatinib          | 21<br>VS.<br>13                          | 52.4<br>VS.<br>69.2                               | 2.8 (2.1 – 3.4)<br>VS.<br>18.3 (3.2 – 33.4)                                 | Not reported                                   |
| Kim <i>et al</i> , 2019 <sup>33</sup>                          | Retrospective | Korea   | Uncommon mutations [excluding / including <i>de novo</i> T790M mutations] | Gefitinib<br>VS.<br>Erlotinib<br>VS.<br>Afatinib | 9 / 12<br>VS.<br>5 / 5<br>VS.<br>10 / 14 | 44.4 / 33.3<br>VS.<br>20 / 20<br>VS.<br>80 / 57.1 | Not reported / 5.0<br>VS.<br>Not reported / 6.1<br>VS.<br>Not reported / NR | Not reported                                   |
| Lau <i>et al</i> , 2019 <sup>34</sup>                          | Retrospective | Canada  | Uncommon mutation subgroup                                                | Gefitinib/ erlotinib<br>VS.<br>Afatinib          | 7<br>VS.<br>9                            | Not reported                                      | Not reported                                                                | 32.7 (1.1 – NR)<br>VS.<br>48.5 (6.4 – NR)      |
| Chang <i>et al</i> , 2019 <sup>35</sup>                        | Retrospective | Taiwan  | Non-resistant uncommon mutations                                          | Gefitinib/ erlotinib<br>VS.<br>Afatinib          | 39<br>VS.<br>33                          | 35.8<br>VS.<br>60.6                               | 8.8 (4.8 – 12.8)<br>VS.<br>12.0 (9.5 – 14.5)                                | 29.0 (22.8 – 35.2)<br>VS.<br>27.6 (2.1 – 53.1) |
| <b><i>Second generation EGFR inhibitors only</i></b>           |               |         |                                                                           |                                                  |                                          |                                                   |                                                                             |                                                |
| Heigener <i>et al</i> ,                                        | Observational | Germany | Uncommon                                                                  | Afatinib                                         | 58                                       | 22                                                | Not reported                                                                | Not reported                                   |

| 2015 <sup>42</sup>                      | prospective   |       | mutations <sup>a</sup>                    |          |     |      |              |                    |
|-----------------------------------------|---------------|-------|-------------------------------------------|----------|-----|------|--------------|--------------------|
| Moran <i>et al</i> , 2020 <sup>43</sup> | Retrospective | Spain | Uncommon mutations <sup>a</sup> including | Afatinib | 67  | 44.8 | Not reported | 19.9 (9.7 – 30.1)  |
|                                         |               |       | Single mutations                          |          | 24  | 54.1 |              | 19.9 (10.8 – 29.0) |
|                                         |               |       | and                                       |          | and | and  |              | and                |
|                                         |               |       | Complex mutations                         |          | 20  | 70   |              | 28.8 (20.8 – 36.8) |

<sup>a</sup> Included T790M mutations, exon 20 insertions, and/or complex mutations involving exon 19 deletion and L858R

Abbreviations: CI = Confidence intervals, del = deletion, N = number of patients, NE = Not estimable, NR = not reached, OS = Overall survival, PFS = Progression-free survival,

TKI = Tyrosine kinase inhibitor.
